# Supplementary material
Source: Royal Society of Chemistry journal article supplement (doi:10.1039/d5tb02902c)
Supplement: d5tb02902c1.pdf [file d5tb02902c1.pdf]

## Supporting Information

### **Polarity-triggered high-contrast fluorescent imaging of lipid droplets via a naphthalimide fluorophore**

Yuanqian Yang <sup>a#</sup>, Haixu Wang <sup>a#</sup>, Xiaoqian Gao <sup>a</sup>, Yao Fu <sup>a</sup>, Hong Wang <sup>a</sup>,  
Mingming Xing <sup>a</sup>, Yao Fu <sup>a</sup>, Fangyun Xin <sup>a,\*</sup>, Ying Tian <sup>a,\*</sup>, Yong Tian <sup>a,\*</sup>, Xiaoling  
Zhang <sup>b</sup>

<sup>a</sup> School of Science, Dalian Maritime University, Dalian 116026, PR China

<sup>b</sup> School of Chemistry and Chemical Engineering, Beijing Institute of Technology,  
Beijing 100081, PR China

## Materials and Instrumentals

$^1\text{H}$  NMR spectra were obtained from a 600 MHz Bruker Advance II. Mass spectrometry analysis was carried out using Agilent 7250, USA and JEOL-JMS-T100LP AccuTOF, Japan. Absorption spectra were determined using Shimadzu UV-3600 spectrophotometer. Fluorescence spectra were carried out at room temperature by Edinburgh FS5 fluorescence spectrometer. Theoretical calculations were performed using the Gaussian 09 program packages, and the structures were optimized at the B3LYP/6-31g(d) level. All chemical reagents were purchased at the highest commercial quality and used without further purification unless otherwise stated, and distilled water was used after purification by a water ultra-purification system.

## Synthesis of NA-LD

Under nitrogen atmosphere, a mixture of **1**<sup>[1]</sup> (381 mg, 1 mmol), 1-ethynyl-4-methoxybenzene (198 mg, 1.5 mmol),  $\text{Pd}(\text{PPh}_3)_2\text{Cl}_2$  (70 mg, 0.1 mmol),  $\text{CuI}$  (19 mg, 0.1 mmol), and  $\text{Et}_3\text{N}$  (10 mg, 0.1 mmol) in toluene (30 mL) was reflux under stirring overnight, after cooling to room temperature, and the reaction mixture was poured into water and extracted with dichloromethane. The organic layer was dried with anhydrous  $\text{Na}_2\text{SO}_4$  and concentrated. The residue was purified by column chromatography eluting with petroleum ether and dichloromethane (4/1, v/v) to afford a light-yellow solid (263 mg, 61%).  $^1\text{H}$  NMR (600 MHz,  $\text{CDCl}_3$ )  $\delta$ /ppm 8.75 (d,  $J=12$  Hz, 1H), 8.64 (d,  $J=12$  Hz, 1H), 8.55 (d, 2H), 7.93 (d,  $J=12$  Hz, 1H), 7.84 (t,  $J=6$  Hz, 1H), 7.73-7.66 (m, 1H), 7.65-7.58 (m, 3H), 7.52-7.45 (m, 1H), 6.98 (d,  $J=12$  Hz, 2H), 4.61 (t,  $J=6$  Hz, 2H), 3.90 (s, 3H), 3.26 (t,  $J=6$  Hz, 2H).  $^{13}\text{C}$  NMR (150 MHz,  $\text{CDCl}_3$ )  $\delta$ /ppm 163.90, 163.63, 160.58, 159.00, 136.35, 133.54, 132.49, 132.08, 131.56, 130.49, 130.37, 128.56, 128.16, 127.28, 123.23, 122.93, 121.67, 121.46, 114.34, 99.58, 85.38, 55.42, 40.18, 36.42. HRMS:  $m/z$  433.1561  $[\text{M}+\text{H}]^+$ , calcd. for  $\text{C}_{28}\text{H}_{20}\text{N}_2\text{O}_3$ : 432.1474.

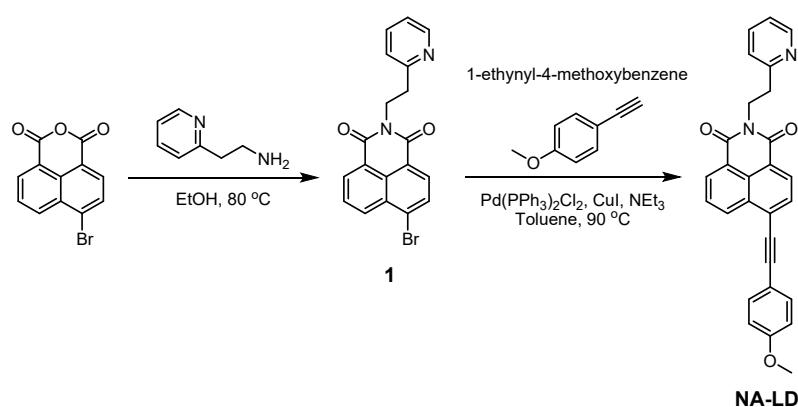

**Figure S1.** The synthetic route of probe NA-LD.

## General Analytical Procedure

The stock solution of **NA-LD** was prepared in DMSO and stored at 4 °C before use. The solutions of K<sup>+</sup>, Cu<sup>2+</sup>, Mg<sup>2+</sup>, Ca<sup>2+</sup>, Zn<sup>2+</sup> were prepared from their chloride salts. Sodium hypochlorite (ClO<sup>-</sup>) was prepared by diluting 14.5% aqueous solution. Hydrogen peroxide (H<sub>2</sub>O<sub>2</sub>) was prepared by diluting the commercially available 30% aqueous solution. Peroxynitrite anion (ONOO<sup>-</sup>) was prepared by mixing the HCl and H<sub>2</sub>O<sub>2</sub> into a solution of sodium nitrite (NaNO<sub>2</sub>) and sodium hydroxide (NaOH) at 0 °C. Glucose, cysteine (Cys) and glutathione (GSH) were dissolved in ultrapure water.

## Cytotoxicity Cells

The in vitro cytotoxicity of **NA-LD** was assessed using the standard CCK-8 assay. 4T1 cells were inoculated in 96-well plates at  $5 \times 10^3$  cells/well with DMEM in a humidified incubator at 37 °C with 5% carbon dioxide. After 24h, each well was treated with various concentrations of **NA-LD** (0, 2, 5, 10, 20 μM) in fresh medium. After 24 h, the cells were treated with CCK-8 reagent in fresh medium, and the absorbance of CCK-8 was determined by a Bio-Rad 680 ELIASA at 450 nm and all the measurements were completed for three times. Cell viability was calculated using the following formula: Cell viability ratio (%) =  $(OD_{\text{Sample}} - OD_{\text{PBS}})/(OD_{\text{Blank}} - OD_{\text{PBS}}) \times 100\%$ .

## Fluorescence Imaging of Lipid Droplets in Living Cells

4T1 cells (human breast cancer cells), HepG2 cells (human liver cancer cells), 3T3 cells (embryonic mouse fibroblast cells), and HUVEC cells (human umbilical vein endothelial cells) were used for experiment. (1) 4T1 cells were treated with **NA-LD** (10 μM) and cocultured with Lyso-Tracker Red (2 μM), Mito Tracker Red (2 μM), ER Tracker Red (2 μM), HCS lipidTOX (2 μM), respectively, at 37 °C, then washed with PBS for three times, and conducted to fluorescence imaging. (2) 4T1 cells were treated with different concentrations of **NA-LD** (2.5, 5, 10, 20 μM) for 30 min at 37 °C, then washed with PBS for three times, and conducted to fluorescence image. (3) 4T1 cells were treated with oleic acid (oleic acid was used to stimulate cells to produce more LDs) for 0, 2, 4, 6 h respectively, the group of 0 h was set as the control group untreated oleic acid, after that the oleic acid was washed with PBS, then stained with **NA-LD** (10 μM) for 30 min, and conducted to fluorescence image after washing with PBS for three times. (4) 4T1, HepG2, 3T3 and HUVEC cells were incubated with **NA-LD** (10 μM) for 10 min at 37 °C, then conducted to fluorescence image after washing with PBS for three times. Fluorescence imaging was used with a ZEISS LSM900 confocal fluorescence microscope with proper excitation wavelength.

**Table S1. Comparison of reported LD probe**

| Probe                                                                               | $\lambda_{\text{abs}}/\lambda_{\text{em}}$ (nm) | Targeting specificity (LDs) | Photostability | Cytotoxicity | pH tolerance | Ref.      |
|-------------------------------------------------------------------------------------|-------------------------------------------------|-----------------------------|----------------|--------------|--------------|-----------|
| 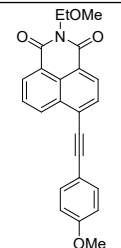   | 382/470<br>(1,4-dioxane)                        | good                        | poor           | low          | high         | [2]       |
|    | 441/565<br>(1,4-dioxane)                        | good                        | NA             | low          | low          | [3]       |
|    | 404/500<br>(Toluene)                            | good                        | moderate       | high         | NA           | [4]       |
|   | 405/520<br>(1,4-dioxane)                        | poor                        | NA             | low          | high         | [5]       |
|  | 392/450<br>(Toluene)                            | good                        | NA             | low          | NA           | [6]       |
|  | 433/510<br>(1,4-dioxane)                        | good                        | moderate       | low          | NA           | [7]       |
|  | 382/470<br>(1,4-dioxane)                        | good                        | good           | low          | high         | This work |

NA: not available.

## Calculation of $\Delta f$ values

The polarity value of the solvent is calculated by the following equation:

$$\Delta f = (\varepsilon - 1)/(2\varepsilon + 1) - (n^2 - 1)/(2n^2 + 1)$$

where  $\varepsilon$  denotes the dielectric constant and  $n$  denotes the refractive index.

## Characteristics of NA-LD

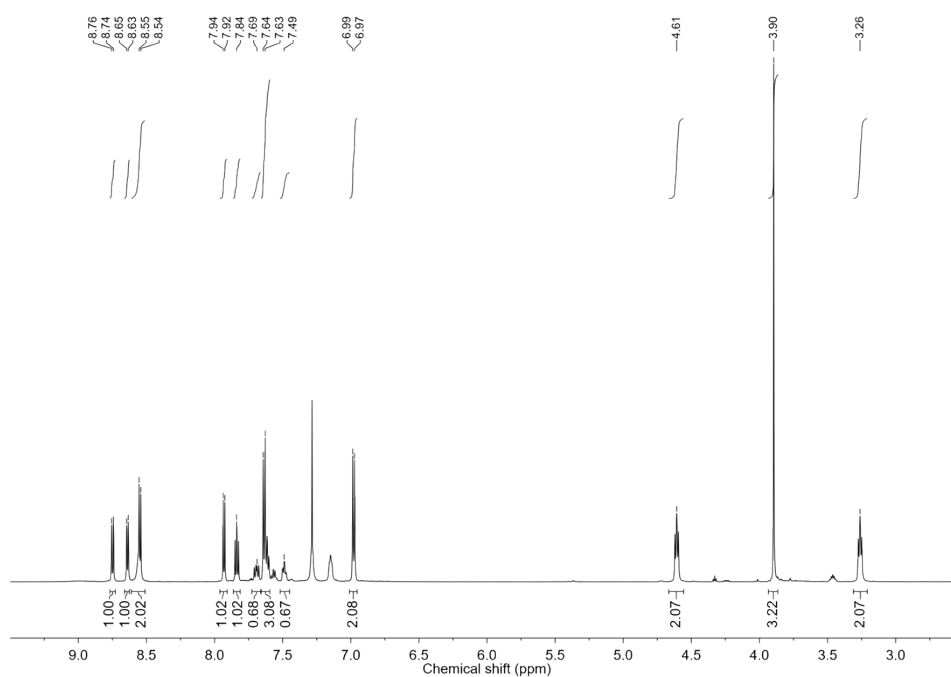

Figure S2.  $^1\text{H}$  NMR spectrum of NA-LD.

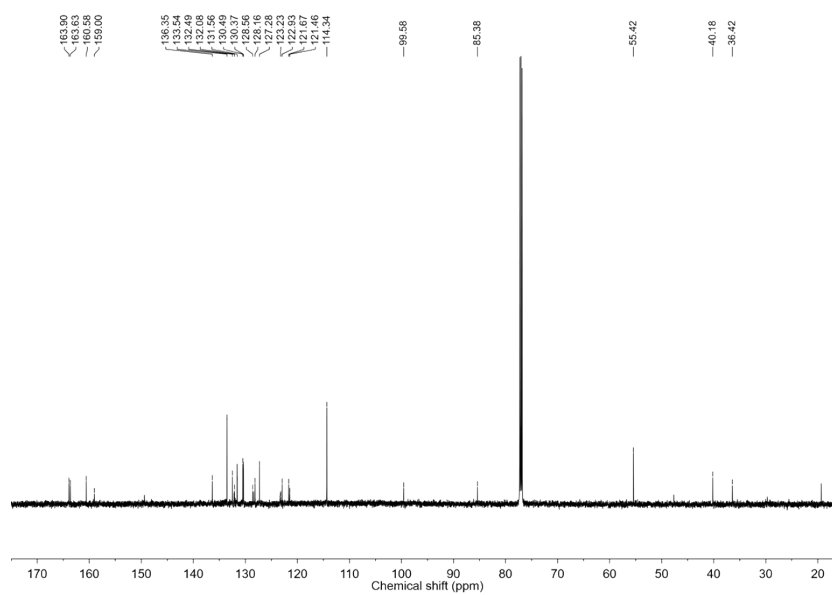

**Figure S3.**  $^{13}\text{C}$  NMR spectrum of NA-LD.

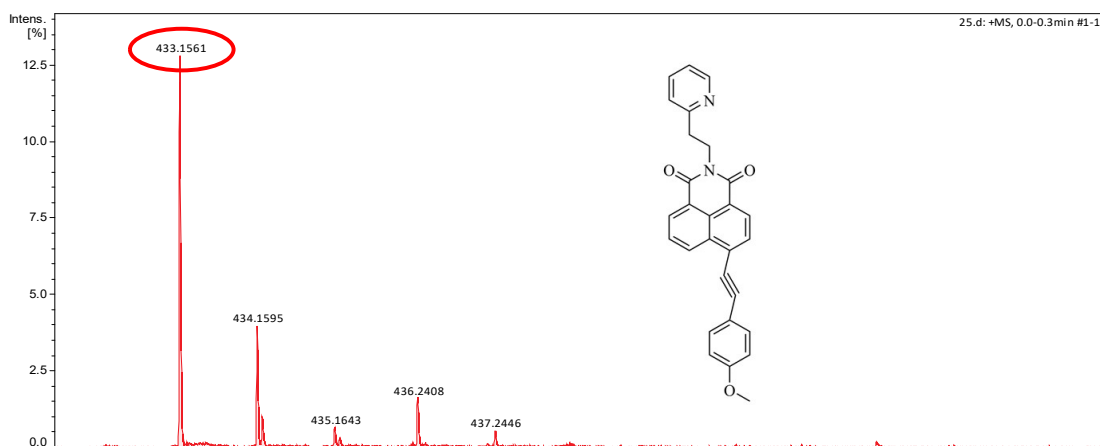

**Figure S4.** HR-MS spectrum of NA-LD.

**Table S2.** The properties of NA-LD in different solvents

| Solvent          | $\lambda_{\text{abs,max}}$ (nm) | $\lambda_{\text{em,max}}$ (nm) | Stokes shift<br>(nm) | $\epsilon$<br>( $\text{L}\cdot\text{mol}^{-1}\cdot\text{cm}^{-1}$ ) | $\Delta f$ |
|------------------|---------------------------------|--------------------------------|----------------------|---------------------------------------------------------------------|------------|
| 1,4-Dioxane      | 382                             | 470                            | 88                   | 21300                                                               | 0.0205     |
| Ethyl acetate    | 387                             | 494                            | 107                  | 22800                                                               | 0.1998     |
| THF              | 390                             | 498                            | 108                  | 22300                                                               | 0.2052     |
| DMF              | 394                             | 545                            | 151                  | 21000                                                               | 0.2763     |
| EtOH             | 396                             | 549                            | 153                  | 20200                                                               | 0.2897     |
| MeOH             | 395                             | 565                            | 170                  | 22100                                                               | 0.3079     |
| H <sub>2</sub> O | 369                             | 573                            | 204                  | 7360                                                                | 0.3212     |

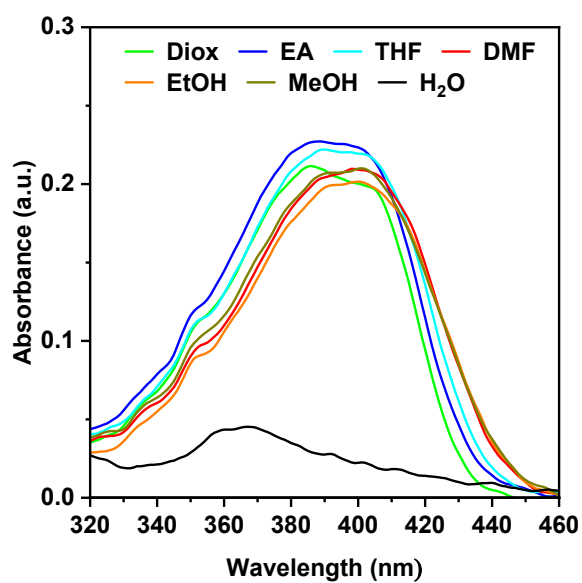

**Figure S5.** Absorption spectra of NA-LD (10  $\mu\text{M}$ ) in different polarity solvents.

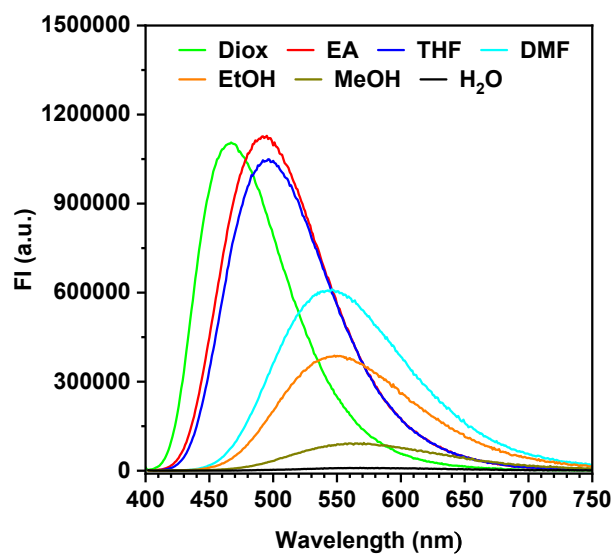

**Figure S6.** Fluorescence spectra of NA-LD (10  $\mu$ M) in different polarity solvents.

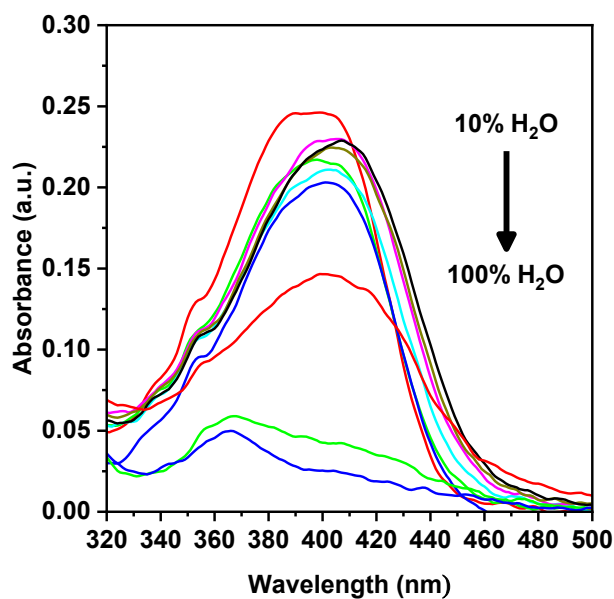

**Figure S7.** Absorption spectra of NA-LD (10  $\mu$ M) in the H<sub>2</sub>O/Diox mixture with H<sub>2</sub>O fractions ranging from 10% to 100%.

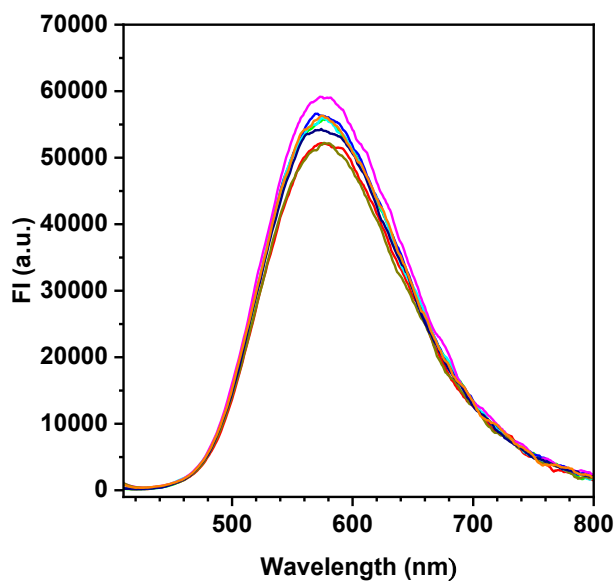

**Figure S8.** Fluorescence spectra of **NA-LD** (10  $\mu\text{M}$ ) in phosphate buffer (20 mM) with pH values ranging from 4 to 10.

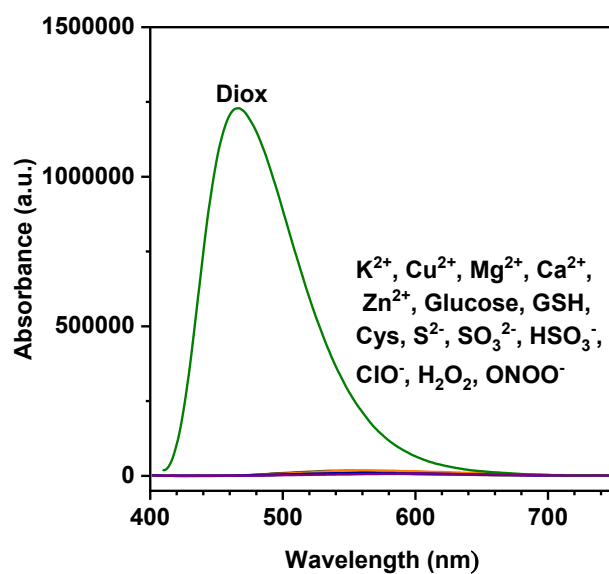

**Figure S9.** Fluorescence spectra of **NA-LD** (10  $\mu\text{M}$ ) to various substances:  $\text{K}^+$  (150 mM),  $\text{Cu}^{2+}$  (100 mM),  $\text{Mg}^{2+}$  (2 mM),  $\text{Ca}^{2+}$  (2 mM),  $\text{Zn}^{2+}$  (100 mM), Glucose (10 mM), GSH (1 mM), Cys (100 mM),  $\text{S}^{2-}$  (100 mM),  $\text{SO}_3^{2-}$  (100 mM),  $\text{HSO}_3^-$  (100 mM),  $\text{OCl}^-$  (100 mM),  $\text{H}_2\text{O}_2$  (100 mM),  $\text{ONOO}^-$  (100 mM), Diox.

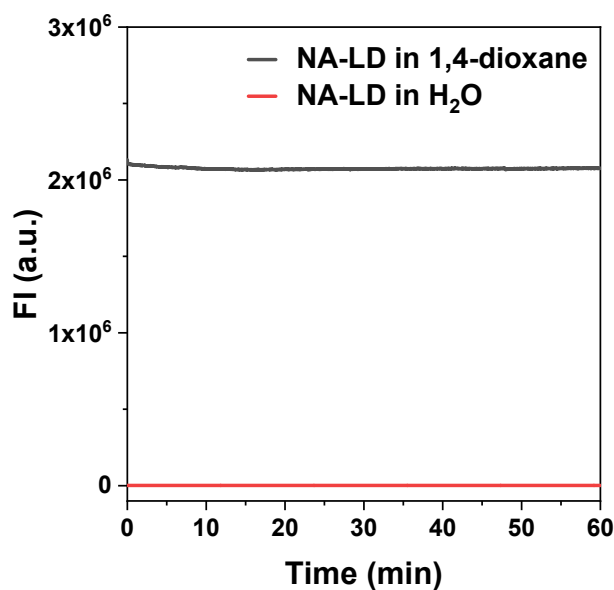

**Figure S10.** The time-dependent fluorescence of NA-LD in 1,4-dioxane and H<sub>2</sub>O respectively.

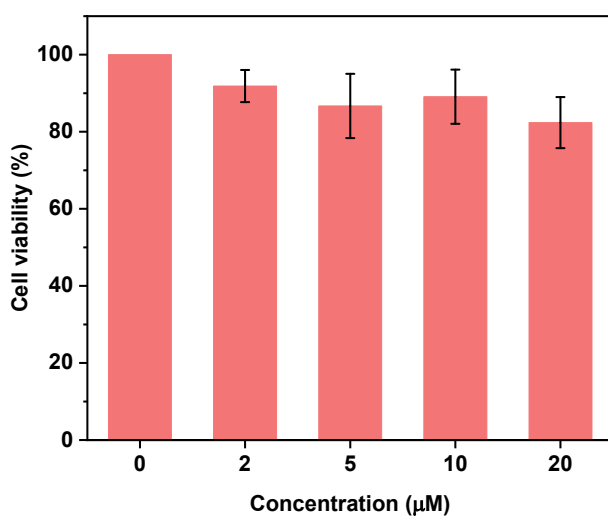

**Figure S11.** The viability of 4T1 cells treated with different concentrations of NA-LD (0, 2, 5, 10, 20 μM).

## References

[1] F.Y. Xin, Y. Tian, C.C. Gao, B.P. Guo, Y.L. Wu, J.F. Zhao, J. Jing, X.L. Zhang, A two-photon fluorescent probe for basal formaldehyde imaging in zebrafish and visualization of mitochondrial damage induced by FA stress, *Analyst* 2019,144, 2297-2303.

[2] Q.N.N. Pham, H.M. Triet, M. Sukwattanasinitt, Y.-T. Chang, P. Rashatasakhon, Visualization of lipid droplets in living cells using (4-methoxyphenyl)ethynyl-naphthalimide, *ChemPhotoChem*

2026, 10, e202500329.

[3] K. Leewongwat, Q.N.N. Pham, S. Namuangruk, M. Sukwattanasinitt, Y.-T. Chang, P. Rashatasakhon, Polarity and viscosity-sensitive fluorescent probe for lipid droplet imaging, *ChemPhotoChem* 2025, 9, e202500176.

[4] L. Michel, P. Durand, A. Chevalier, A naphthalimide based “turn-on” probe for wash-free imaging of lipid-droplet in living cells with an excellent selectivity, *ChemBioChem* 2024, 25, e202400270.

[5] A. K.K, S. Maity, N. Pareek, P. Kar, P. Maiti, S. Bhuniya, Fluorescent rotor: Labeling lysosomes, mitochondria and lipid droplets through polarity and viscosity assessment, *J. Photoch. Photobio. A: Chem.* 2024, 454, 115727.

[6] I.R.D. Johnson, E.E. Rudebeck, M.J. Sweetman, A. Sorvina, T.D. Ashton, F.M. Pfeffer, D.A. Brooks, S.M. Hickey, A 3,4-dimethoxy-1,8-naphthalimide for lipid droplet imaging in live and fixed cells, *Sens. Actuators B: Chem.* 2022, 365, 131921.

[7] X. Li, J. Bian, M. Fu, Y. Zhang, H. Liu, B. Gao, Photostable fluorescent probes based on multifunctional group substituted naphthalimide dyes for imaging of lipid droplets in live cells, *Anal. Methods* 2022, 14, 1279-1284.
